# Supplementary material for: HMEJ-based safe-harbor genome editing enables efficient generation of cattle with increased resistance to tuberculosis
Source: PubMed Central journal article supplement — J Biol Chem. 2021 Mar 4;296:100497. doi: 10.1016/j.jbc.2021.100497 (PMC8038940; doi:10.1016/j.jbc.2021.100497), 2021-03-04
Supplement: mmc1.pdf [file mmc1.pdf]

**HMEJ-based safe-harbor genome editing enables efficient generation of cattle with increased resistance to tuberculosis**

Mengke Yuan, Jingcheng Zhang, Yuanpeng Gao, Zikun Yuan, Zhenliang Zhu, Yongke Wei, Teng Wu, Jing Han and Yong Zhang

**Supporting Information**

**Supporting Tables**

**Table S1.** Sequences of primers for qPCR.

**Table S2.** Sequences of primers for promoter fragments amplification.

**Table S3.** Sequences of primers for promoter fragments amplification.

**Table S4.** Primer sequences for sgRNA cloning.

**Table S5.** Sequences of primers for Junction PCR.

**Table S6.** Sequences of sgRNA11 potential on/off target sites.

**Table S7.** Primer sequences for amplification of potential off target region.

**Supporting Figures**

**Figure S1.** Comparison of mouse, bovine and pig *ROSA26* promoter and exon 1 sequences showed high sequence conservation among these species.

**Figure S2.** Identification of the b*ROSA26* non-coding RNA.

**Figure S3.** Insertion and selection of the reporter genes transgenic colonies by HDR-based method.

**Figure S4.** Representative junction PCR of the reporter gene transgenic colonies by HMEJ-, NHEJ- and HDR-based method.

**Figure S5.** Photographs of *NRAMP1* gene KI colony and representative junction PCR results of puromycin-resistant colonies.

**Figure S6.** Sanger sequencing results of eight potential off-target sites in gene-edited cattle.

## Supporting Tables

**Table S1. Sequences of primers for qPCR.**

| Gene name      | Primer  | Sequence (5'-3')          | Product length |
|----------------|---------|---------------------------|----------------|
| <i>ROSA26</i>  | Forward | GCGTTTGTACTACTTGCTCATC    | 243 bp         |
|                | Reverse | AAGAGGGTCAGTAGAATCCCA     |                |
| $\beta$ -actin | Forward | ATCACCATCGGCAATGAGCGGTTC  | 217 bp         |
|                | Reverse | CGGATGTCGACGTCACACTTCATGA |                |
| <i>THUMPD3</i> | Forward | GCAAAATCAGCAAAGACCGG      | 129 bp         |
|                | Reverse | TGAACTGGTAATCCTTAAACTCCTG |                |
| <i>SETD5</i>   | Forward | AGCAAGCTCCTGAGAAAGTAAC    | 200 bp         |
|                | Reverse | CTTCAACCTTCTATCTTCCCG     |                |
| <i>LHFPL4</i>  | Forward | GCCACGGTCTACAAGATCTG      | 204 bp         |
|                | Reverse | GATGAGGGCGTTGAGGATG       |                |

**Table S2. Sequences of primers for promoter fragments amplification.**

| Vectors           | Primer  | Sequence (5'-3')                 | Product length |
|-------------------|---------|----------------------------------|----------------|
| pGL4.10-2007/+505 | Forward | CTCGCTAGCAGATTCTAATCCCATAACGAGC  | 2512 bp        |
|                   | Reverse | CCCAAGCTTCCACCCTACCTACCTAAGCAC   |                |
| pGL4.10-1807/+505 | Forward | CTCGCTAGCAAACACTGATATAAAACTAATC  | 2312 bp        |
| pGL4.10-1607/+505 | Forward | CTCGCTAGCTAAAGGAAATTTGCAGAGAACC  | 2112 bp        |
| pGL4.10-1407/+505 | Forward | CTCGCTAGCAGAGCTGGCTGCAGCATC      | 1912 bp        |
| pGL4.10-1207/+505 | Forward | CTCGCTAGCGGAAAGAGAATTGATAAAGGC   | 1712 bp        |
| pGL4.10-1007/+505 | Forward | CTCGCTAGCTAATGTCCTTAGTGTGGGAAACG | 1512 bp        |
| pGL4.10-807/+505  | Forward | CTCGCTAGCGAGGAGAGCAGTGAGAGG      | 1312 bp        |
| pGL4.10-607/+505  | Forward | CTCGCTAGCAGGGGGATGAGAAGGG        | 1112 bp        |
| pGL4.10-407/+505  | Forward | CTCGCTAGCGAGGCAGCAGGACTCGAGTTA   | 912 bp         |

**Table S3. Sequences of primers for promoter fragments amplification.**

| Vectors           | Primer  | Sequence (5'-3')                | Product length |
|-------------------|---------|---------------------------------|----------------|
| pGL4.10-1007/+505 | Forward | CTCGCTAGCAGATTCTAATCCCATAACGAGC | 1512 bp        |
|                   | Reverse | CCCAAGCTTCCACCCTACCTACCTAAGCAC  |                |
| pGL4.10-1007/+405 | Reverse | CCCAAGCTTAAACACGCCATTTGTG       | 1412 bp        |
| pGL4.10-1007/+305 | Reverse | CCCAAGCTTCTCCGTCCGATTCGA        | 1312 bp        |
| pGL4.10-1007/+205 | Reverse | CCCAAGCTTTTCAGCGTAACAAACGC      | 1212 bp        |
| pGL4.10-1007/+105 | Reverse | CCCAAGCTTCGGACCCCTCCACCA        | 1112 bp        |
| pGL4.10-1007/+5   | Reverse | CCCAAGCTTCTCCGCTGATTGGCAG       | 1012 bp        |

**Table S4. Primer sequences for sgRNA cloning.**

| Number | Top Guide oligo             | Bottom Guide oligo        |
|--------|-----------------------------|---------------------------|
| 11     | CACCGTGTCTCGAGTCTCGATTATGGG | AAACCCATAATCGAGACTCGACAC  |
| 34     | CACCGAGCGAAACCACTGCGCGGGT   | AAACACCCGCGCAGTGGTTTCGCTC |
| 43     | CACCGTCCATGTCTCGAGTCTCGATTA | AACTAATCGAGACTCGACATGGAC  |
| 44     | CACCGCCATGTCTCGAGTCTCGATTAT | AAACATAATCGAGACTCGACATGGC |
| 45     | CACCGTTGCAGTCTCGCGCCGATTTT  | AAACAAAATCGGCGCGAGCTGCAAC |

**Table S5. Sequences of primers for Junction PCR.**

| Primer | Sequence (5'-3')     | Product length |
|--------|----------------------|----------------|
| Lj-S   | GCCAATCAGCGGAAGCC    | 1824 bp        |
| Lj-A   | TTCACCTTGATGCCGTTCTT |                |
| Rj-S   | ATAATCAGCCATAACCACA  | 2833 bp        |
| Rj-A   | TTCCAGCCTACCAACA     |                |
| Rj-S'  | CAGGCAGATTCTTTACCG   | 2261 bp        |
| Rj-A'  | CAAGTCACTCATTCCGTTT  |                |

**Table S6. Sequences of sgRNA11 potential on/off target sites.**

| Name        | On-target site          | Potential off-target site |
|-------------|-------------------------|---------------------------|
| sgRNA11-OT1 |                         | TtaaGgGTCTtGATTATGGGTGG   |
| sgRNA11-OT2 |                         | TGTgGAGaaTaGATTATGGGTGG   |
| sgRNA11-OT3 |                         | TtTaGAtgCTtGATTATGGGGGG   |
| sgRNA11-OT4 | TGTCGAGTCTCGATTATGGGNGG | TGatGtGaCTgGATTATGGGGGG   |
| sgRNA11-OT5 |                         | gGTCagtTCcCGATTATGGGCGG   |
| sgRNA11-OT6 |                         | TGTgGAGagTgGATTATGGGTGG   |
| sgRNA11-OT7 |                         | TGTCGtGgtTaGATTATGGGAGG   |
| sgRNA11-OT8 |                         | TGTgGttgCTgGATTATGGGAGG   |

**Table S7. Primer sequences for amplification of potential off target region.**

| Name        | Primer  | Sequence (5'-3')    | Product length |
|-------------|---------|---------------------|----------------|
| sgRNA11-OT1 | Forward | ACCTGGTCTTCTGCTTCA  | 597 bp         |
|             | Reverse | TCCTCTTTCCTTCTCCCT  |                |
| sgRNA11-OT2 | Forward | AGGAGGATGGAAGTGAA   | 550 bp         |
|             | Reverse | TACTTGGGTGTCTCATAAA |                |
| sgRNA11-OT3 | Forward | CACAGAATCGCCTCC     | 638 bp         |
|             | Reverse | ATGCCTCAAAGAATGG    |                |
| sgRNA11-OT4 | Forward | TGTCTCAGAAACCCTACAA | 515 bp         |
|             | Reverse | GGAGTCTACAGGCACCAT  |                |
| sgRNA11-OT5 | Forward | CCTGCACCCTAATAGATGG | 458 bp         |
|             | Reverse | GACGAATGCCTCCGACT   |                |
| sgRNA11-OT6 | Forward | AACACTGGGCATCTGG    | 430 bp         |
|             | Reverse | GGGAGGAATGGGCTA     |                |
| sgRNA11-OT7 | Forward | TACACTAAATCACGCAGAC | 375 bp         |
|             | Reverse | AGTGGCAGGGATGG      |                |
| sgRNA11-OT8 | Forward | GGGAAGATGAATGAAAGCA | 687 bp         |
|             | Reverse | CATTACCAGCAGTTAGGGA |                |

## Supplementary Figures

|        |                                                                                                                         |
|--------|-------------------------------------------------------------------------------------------------------------------------|
| Mouse  | TTTGGTGTGGGAAAAGCAGCAGCCATCTGAGATAGGAACTGGA AAAACAGAGGAGAGCGGTT CAGGAAGATTATGGAG-----GGGAGGACTGGGCCCCACGAGCG--ACCAGAGTT |
| Bovine | ----GTGTGGGAAACGAAGCAATCATCTGCGATGGGACCCAGGACGAGGGGGAAGCGTCCAGGAACATTCGGGGTGGGGTGGGGAGATCGAAGCCCCCCGAGAGGGATCAGAGTT     |
| Pig    | ----GTGTGGGAAAGGAAGCAATCATCTGCAATAGGGACCTTAGGACGAGAGAAAGCGTCCAGGAACATTC TTGGA--GGG--GGGAGATCGAGGGCCCCA-GAGCG--ACCAGAGTT |
| Mouse  | GTCACAAGGCCGCAAGAACAGGGGAGGTGGGG--GCTCAGGGACAGAAAAAAA--GTATG---TGTATTTTGAGAGCAGGGT--TGGGAGCCTCTCTGAAA--AGGGTATAAACGTGG  |
| Bovine | GTCACAAGGCCGCGCGAACCGGGGTGGGGTGGCGTTTGGGAGGGGAAAAAAA--GTGTGCTGTGTATTTTGAGAGGAGAGCAGTGAGAGGCCATCTCTCAAGTAAAAGGTAACCGTGG  |
| Pig    | GTCACAAGGCCGCGCGAACCGGGGTGGGGTGGGGTTTGGGAGGGGAAAAAAAAGTGTG---TGTGTATTTGAGGAGGGCGCGAGAGGCCATTCTCAAGTAAAAGGTAACCGTGG      |
| Mouse  | AGTAGGCAATACCAGGCAAAAAGGGAGACCAGAGTAGGGGGAGGGGAAGTCTGACCCAGGAAGACATTA AAAAGGTAGTGGGTCGACTAGATGAGGAGCCTTCTCTCTG          |
| Bovine | AGTAGGCAATCCCGGG--AAAAGGGTGAAGAGGCGTGGGGGAGGGGAAGCTCTGACCCAGGAAGACGTGAAAAGGTAGTGGGTCGACGAGATTACGGATGGGGCTCTCGCC         |
| Pig    | AGTAGGCAATTCACAGG--AAAAGGGTGAAGAGGCGTGGGGGAGGGGAAGCTCTGACCCAGGAAGACATGAAAAGGTAGTGGGTCGACTAGATTAGGAGGGGGCTCTCGCC         |
| Mouse  | GGCAAGAGCGGTGCAATGGTGTAAAGG--TAGCTGAGAAGACAAAAGGGCAAGCATCTCTGCTACCAGGCTGGGAGGCCAGGCCACGCCGAGAGAGGGAACGAGGGAG            |
| Bovine | TGGAAAGGGTGCACACGGTGTGTAGGGGCGGGCAGGGGATGAGAAGGGCAACATCTCTACTGAGAGCCTGGGAGGGCCAGGCCACCTCC--GAGAGCAACCGCGGGAG            |
| Pig    | TGGAAAGAGGGGTACAGTGGTGTGGGGG--GCGAGGGGGATGGGAGGGGCAAGCATCTCTGCTGAGAGCGGGGAGGGCCAGGCCACCTCC--GAGAGCAACCGCGGGAGG          |
| Mouse  | ACTGAGG---TGACCTTCTTTCCCGGGGCCCGGTCTGTGGTTCGGTCTCTTTTCTGTGGACCTTACCTTGACCCAGGCGTCCGGGGCTGGGCCCGGGCTGCGGCGCACG           |
| Bovine | ACGGAGGAGGTGACCTTCCCTCCCGGGGCCCGGTCTGAGGGTAGGTTCTCTTTTCTGTGGACCTTACCTTGTCCAGGC-----CTGGGCCCGGGCTGCGGCGCACG              |
| Pig    | ACGGAGGAGGTGACCTTCCCTCCCGGGGCCCGGTGTGAGGGAGGTTCTCTTTTCTGTGCGACCTTACCTTGTCCAGGC-----CTGGGCCCGGGCTGCGGCGCACG              |
| Mouse  | GCACCTCCCGGAGGCAGCGACTCGAGTTAGGCCCAAAGCGCGGCCACGGCGTTTCTGGCCGGGAATGGCCGTACCCGTGAGGTGGGGTGGGGGACAGAAAAGGGGAGCGGAGCCC     |
| Bovine | GCACTCCCGGAGGCAGCGACTCGAGTTAGGCCCAAAGCGCGGCCACGGCGTTTCTGGCCGGGAATGGCCGTCCCGTGAAGTGGGGTGGGGACAGAAA--GGCGAGCGAGCCA        |
| Pig    | GCACCTCCCGTAGGCAGCGACTCGAGTTAGGCCCAAAGCGCGGCCACGGCGTTTCTGGCCGGGAATGGCCGTCCCGTGAAGTGGGGTGGGGGACAGAAA--GGCGAGCGAGCCA      |
| Mouse  | GAGGCGGGAGGGGGA--GGGCCAGGGCGGAGGGG--CGGCCACTACTGTGTGGCGACTGGCGGGACTAGGGTGCCTGAGTCTCTGAGCGCAGCGGGCGGGCCGCCCTCC           |
| Bovine | AGGGCGGGAGGGGGAAGGGCCAGGGAGGGGGG--CGGCCACTACTGTGTGGCGACTGGCGGGACTGGGGTGCCTGAGTCTCTGAGCGCAGCGGGCGGGCCGCCCTCC             |
| Pig    | AGGGCGGTGAGGGGA--GGGCCAGGGAGGGGGGGCGGCCACTACTGTGTGGCGACTGGCGGGACTGGGGTGCCTGAGTCTCTGAGCGCAGCGGGCGGGCCGCCCTCC             |
| Mouse  | CCGGCGGGCAGCGGGCCAGCGGGC-----AGCTCACTAGCCCGCTGCCGAGCGGAAACGCCACTGACCGCACGGGATTCCAGTGCCGGCCAGGGGACCGGGGACAGC             |
| Bovine | CCGGCGGGCAGCGGGCCAGCGGGTAGC-----AGCTCACTAGCCCGCTGCCGAGCGGAAACGCCACTGACCGCACGGGATTCCAGTGCCGGCCAGGGGACCGGGGACAGC          |
| Pig    | CCGGCGGGCAGCGGGCCAGCGGGCAGCAGTCACTAGCCCGCTGCCGAGCGGAAACGCCACTGACCGCACGGGATTCCAGTGCCGGCCAGGGGACCGGGGACAGC                |
| Mouse  | CCCCCTCCCGCGGCCATTGGCTCTCCGCCACCGCCACACTTATTGGCCGTGCCCGCCAATCAGCGGAGCTGCCGGGGCCGCTAAAGAAGAGGCTGTGCTTTGGGGCTCCG          |
| Bovine | CCCCCTCCCGCGGCCATTGGCCCTCCGCCACCGCCCGCACCTATTGGCCAAGTCTGTCGAATCAGCGGAAGCCGCCGGGGCCACTAGAAGAAGGCTGTGCTTTGGGGCTCCG        |
| Pig    | CCCCCTCCCGCGGCCATTGGCCCTCCGCCACCGCTCTGCACTTGGCCAGTCCCGCCAATCAGCGGAAGCCGCCGGGGCCGCTAGAAGAAGGCTGTGCTTTGGGGCTCCG           |
| Mouse  | GCTCCTCAGAGACCTCGGCTAG                                                                                                  |
| Bovine | GCTCCTCAGAGACCTCGGCTAG                                                                                                  |
| Pig    | GCTCCTCAGAGACCTCGGCTAG                                                                                                  |

**Figure S1. Comparison of mouse, bovine and pig *ROSA26* promoter and exon 1 sequences showed high sequence conservation among these species. The top arrow and the bottom arrow denote the 5' start of the mouse and pig *ROSA26* transcript, respectively; the same site of the middle sequence is assumed to be the start of the 5' bovine transcript.**

### 3' RACE

GCCTCGGCTAGGTAGGGGAGCGGAACTCTGGTGAGGGGGTCCGGCGGATTGGTG  
GGGATGGGTGGCTGAGGTCGTCTGGCCGGTACCTGGGGGTCGCTTTCCCCGGTGGGA  
AGAGGGGAGAATAGCGTTTGTACACTTGCTCATCTTGTCCCAGTCATACCATTGGCTT  
TCTCCTCTCCTGTTTTTGGTATCCCGGTGAGTCATGAAACCAGACAGGTTTCACCACCA  
ATTAAGGCTACCCAGCTCGAGCATAGGCTTCACTCTTGCCCAGAAATGCATTTATTCCT  
CTTTTATGGATATTCTGGAGTCTTTACCTTGATTTTCATTTAATTTTTTAACCTCAGCTGG  
GATTCTACTGACCCTCTTAATAGTCCAGATGATCTTGACGACTGCTTTGCTGAGAACCG  
GACGTGAGGTTTCAGCAACATCTCTTTTATATCCTTAGAATAACCTTTCAACCCATTTTCAT  
TGATATGCTTATGAGTTAGTAATCAAGCTCAGTTGCCATAAGGCTAGTATCCTTCGAACT  
AGGATCTCTTGTCTCTGGTATCTGCTGATACAACTTTCATATGTGTCCAGGACAGTAGTT  
CTCATACAAAGATAACAGCATGGAAGTAACCGATCCAACCTCCTTTACTGCCTGGTAACT  
ACTGACAGGATGCGTTCCATCATCACAAATGTGATGTACAAGGTCCCTCAATGGACTAA  
CCTCACCTTAACAGCCTTTTTGTTTGTGACAGTTTTCCACATACACACCCAAACAATATT  
ATTGGACCTCTTTGTAGGGGTGGTTCCTCCTGGAGTGCTACCCTTGATAGTCCTTACCC  
TTCCAATAAAGACTGTAAAACCTC

**Figure S2. Identification of the bROSA26 non-coding RNA.** The partial sequence of the bROSA26 predicated exon 1 was marked with gray shadow. Primer 3' RACE was marked in red.

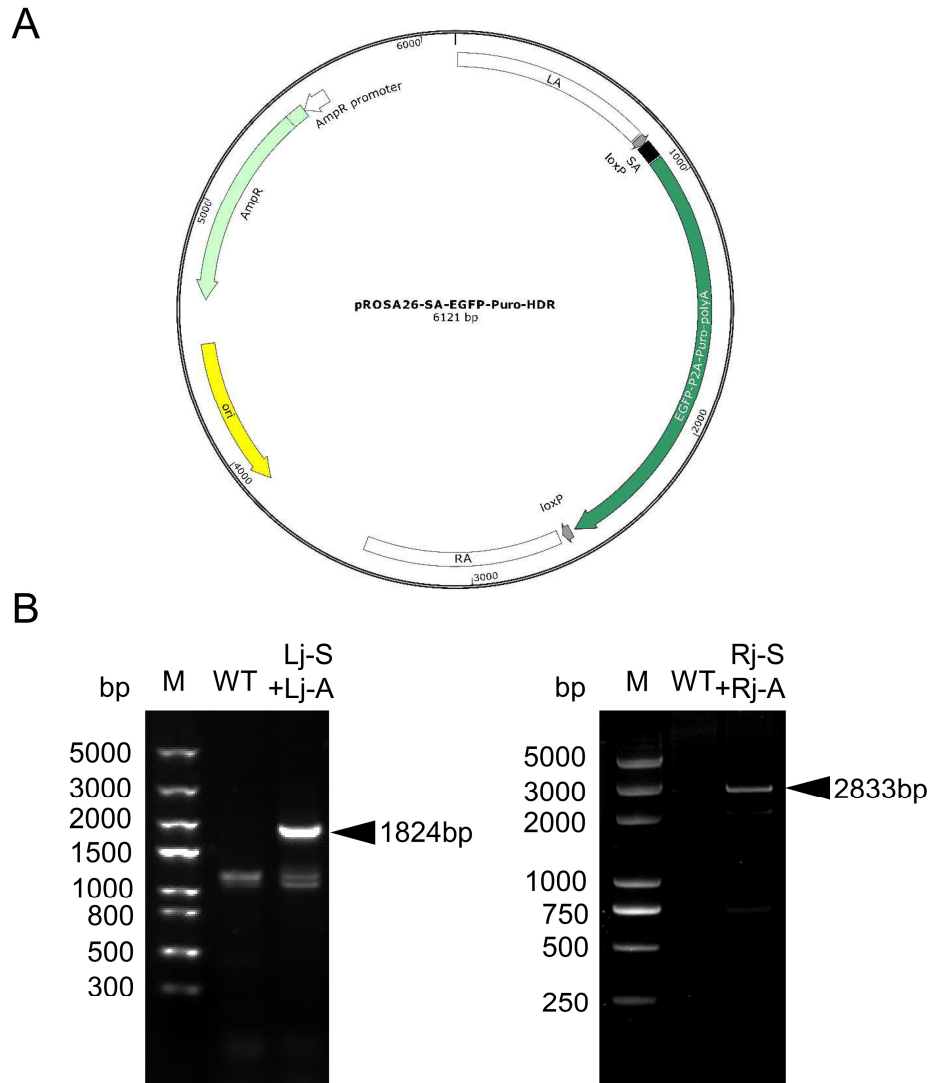

**Figure S3. Insertion and selection of the reporter genes transgenic colonies by HDR-based method.** (A) Schematic representation of the HDR-mediated gene targeting vector. (B) The 5' (left, 1824-bp) and 3' junction (right, 2833-bp) PCR analyses confirming correct joining between genome and HDR-based donor plasmids. “WT” represents wild-type cells (non-transfected BFFs). M, marker.

A

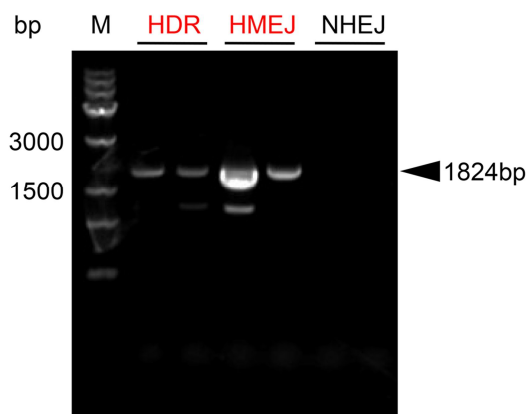

B

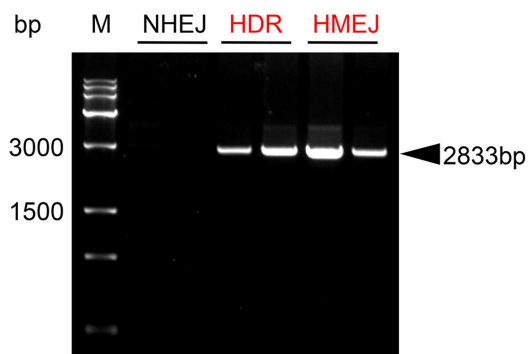

**Figure S4. Representative junction PCR of the reporter gene transgenic colonies by HMEJ-, NHEJ- and HDR-based method.** The 5' (left, 1824-bp) and 3' junction (right, 2833-bp) PCR analyses confirming correct joining in HMEJ and HDR groups. M, marker.



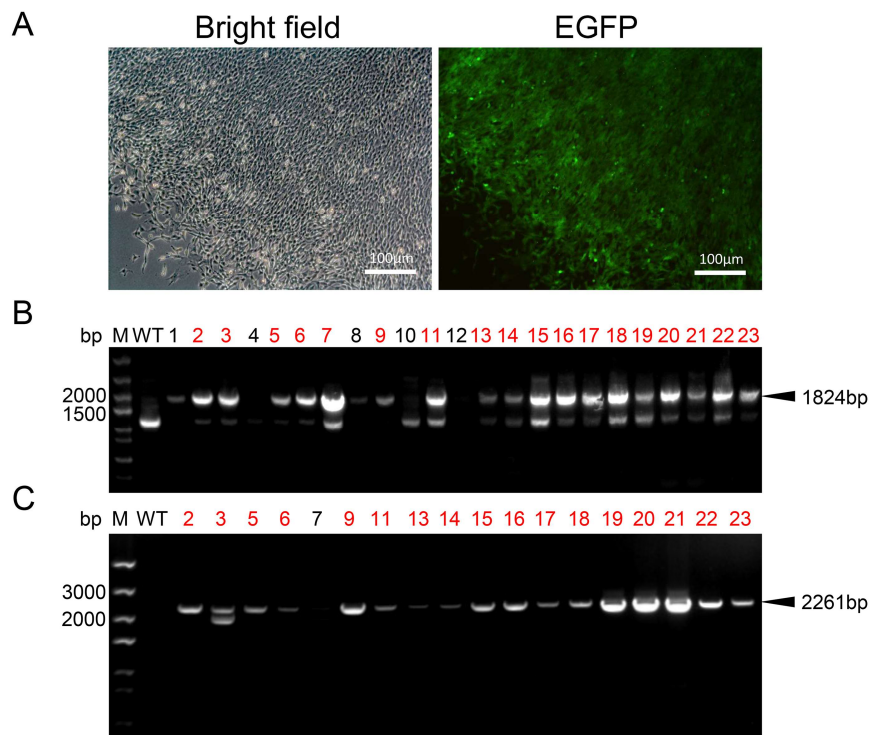

**Figure S5. Photographs of *NRAMP1* gene KI colony and representative junction PCR results of puromycin-resistant colonies.** (A) Stably transfected cells by HMEJ-mediated *NRAMP1* gene KI after positive drug selection under a fluorescence stereomicroscope. (B, C) Representative 5' junction (B, 1824-bp), 3' junction (C, 2261-bp) PCR results of puromycin-resistant colonies. Red fonts represent positive results. "WT" represents wild-type cells (non-transfected BFFs). M, marker.

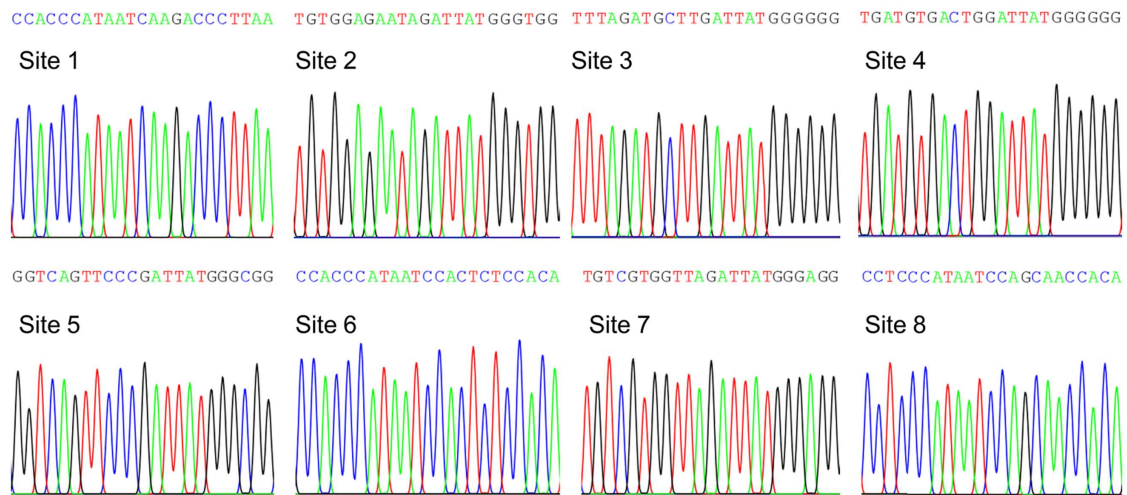

**Figure S6. Sanger sequencing results of eight potential off-target sites in gene-edited cattle.**
